# Supplementary material for: Data on flow cell optimization for membrane-based electrokinetic energy conversion
Source: PubMed Central journal article supplement (PMC5712061; doi:10.1016/j.dib.2017.08.036), 2017-09-01
Supplement: mmc1.pdf [file mmc1.pdf]

To the Editor

---

**Conflict of Interest statement**

To the Editor

I hereby confirm on behalf of all authors that we do not have any conflict of interests.

Kind regards



Anders Bentien  
Associate Professor

**Chemistry & Biotechnology  
Department of Engineering**

**Anders Bentien**

Associate Professor

Date: 16 May 2017

Direct Tel.: +45 3036 9515  
E-mail: bentien@eng.au.dk

Web: [www.eng.au.dk](http://www.eng.au.dk)

Page 1 / 1
